# Supplementary material
Source: PubMed Central journal article supplement (PMC4121640)
Supplement: 15a2a3b69846c4651f1ac0fcc1a3165b_tablesS1-S2.pdf [file 15a2a3b69846c4651f1ac0fcc1a3165b_tablesS1-S2.pdf]

| Probe ID     | Gene Symbol   | Log <sub>2</sub> (fold change) | Average Expression | T Value      | P Value     |
|--------------|---------------|--------------------------------|--------------------|--------------|-------------|
| ILMN_3059557 | Naip5         | 0.352116569                    | 10.05280212        | 13.47913068  | 1.97745E-05 |
| ILMN_2610435 | Terf2ip       | 0.291833334                    | 9.364428047        | 13.11254932  | 2.29296E-05 |
| ILMN_2676052 | Tef           | 0.667637502                    | 10.02573352        | 10.45005619  | 7.68201E-05 |
| ILMN_2809988 | Thumpd3       | -0.276794792                   | 8.625249529        | -10.40752918 | 7.84929E-05 |
| ILMN_2660267 | Dnm1l         | -0.180694224                   | 8.089591821        | -10.28747259 | 8.3451E-05  |
| ILMN_2857580 | Rars2         | -0.246983738                   | 8.544705422        | -9.713993555 | 0.00011286  |
| ILMN_2604521 | NA            | -0.250711452                   | 10.02275895        | -9.698623967 | 0.000113802 |
| ILMN_2710773 | Mon2          | 0.211694713                    | 10.16335006        | 9.517207352  | 0.000125647 |
| ILMN_2721198 | Ggnbp1        | 0.373252817                    | 8.446839992        | 9.361168796  | 0.000137004 |
| ILMN_1221157 | Krt8          | -0.493884549                   | 13.49073565        | -9.357938206 | 0.000137251 |
| ILMN_2708599 | Psmb3         | -0.510350376                   | 11.34660909        | -9.255949362 | 0.000145343 |
| ILMN_2435814 | Trim11        | 0.17879683                     | 8.439326994        | 9.108529895  | 0.000158048 |
| ILMN_1225264 | NA            | -0.716982352                   | 10.14593945        | -9.080947087 | 0.000160567 |
| ILMN_1252110 | Foxj2         | 0.294866794                    | 9.020357182        | 8.938702952  | 0.00017433  |
| ILMN_2660438 | Tank          | -0.280639629                   | 8.312642303        | -8.858968862 | 0.000182648 |
| ILMN_2727329 | Bckdha        | 0.366984679                    | 9.435355832        | 8.844200184  | 0.000184239 |
| ILMN_2782082 | Itm2b         | -0.477714319                   | 11.76711519        | -8.662398115 | 0.000205218 |
| ILMN_2750912 | Fyco1         | 0.379747325                    | 9.428191408        | 8.621964662  | 0.000210256 |
| ILMN_2728830 | Taf13         | -0.175317697                   | 9.549981648        | -8.506956676 | 0.000225399 |
| ILMN_2773099 | Ppa2          | -0.434575839                   | 8.425343823        | -8.373399122 | 0.000244612 |
| ILMN_2595408 | NA            | -0.302673141                   | 10.02370639        | -8.356041404 | 0.000247247 |
| ILMN_2691815 | G3bp2         | -0.206158171                   | 8.058756312        | -8.341232598 | 0.000249522 |
| ILMN_1222767 | H2afj         | 0.371991833                    | 8.840343626        | 8.333209564  | 0.000250764 |
| ILMN_2817996 | Ppa2          | -0.683711411                   | 9.013287738        | -8.277996907 | 0.000259513 |
| ILMN_2642806 | Prpf40a       | -0.149430062                   | 8.219002393        | -8.182070618 | 0.000275578 |
| ILMN_1235447 | Nlrc4         | 0.424779697                    | 9.718758722        | 8.119186343  | 0.00028674  |
| ILMN_1230211 | Ralgps1       | 0.327250977                    | 8.853817725        | 8.117134254  | 0.000287113 |
| ILMN_1237323 | Lman2l        | 0.535158128                    | 9.857103564        | 8.104711406  | 0.000289384 |
| ILMN_2906948 | Rapgef6       | 0.184653792                    | 8.098348727        | 7.97475462   | 0.000314439 |
| ILMN_3009738 | 1600012H06Rik | -0.26986192                    | 8.939888273        | -7.910013199 | 0.000327863 |
| ILMN_2463616 | Mtap7         | 0.332058047                    | 12.72386966        | 7.906832674  | 0.000328539 |
| ILMN_2803399 | Mcm6          | -0.72849969                    | 8.928169325        | -7.82565229  | 0.000346372 |

|              |               |              |             |              |             |
|--------------|---------------|--------------|-------------|--------------|-------------|
| ILMN_2714278 | NA            | 0.236962616  | 8.260884596 | 7.788046205  | 0.000355014 |
| ILMN_3100258 | Theg          | 0.122856727  | 7.983941034 | 7.653738953  | 0.000388002 |
| ILMN_2643879 | Tcigr1        | -0.183320095 | 7.993449554 | -7.552193467 | 0.000415332 |
| ILMN_2793488 | Psma7         | -0.567150097 | 9.734492442 | -7.489272812 | 0.000433393 |
| ILMN_2669540 | Cuta          | 0.434522041  | 11.40276798 | 7.453565153  | 0.00044405  |
| ILMN_2883961 | Vamp7         | -0.590737028 | 9.508120977 | -7.447964067 | 0.000445749 |
| ILMN_2420119 | Mtdh          | -0.259772185 | 8.663393338 | -7.386919885 | 0.000464768 |
| ILMN_1251856 | NA            | -0.392691987 | 9.474017556 | -7.342729223 | 0.000479128 |
| ILMN_2609568 | NA            | 0.27980018   | 10.91261802 | 7.339312714  | 0.00048026  |
| ILMN_1254786 | Ech1          | -0.232452913 | 11.88814138 | -7.319742064 | 0.000486802 |
| ILMN_3140788 | Ptbp1         | 0.404580329  | 11.32498003 | 7.271452067  | 0.000503395 |
| ILMN_2692007 | 4930515G13Rik | 0.14649604   | 7.960252599 | 7.229906947  | 0.000518199 |
| ILMN_1250450 | Ogfr          | 0.431001034  | 10.20589279 | 7.225806371  | 0.000519688 |
| ILMN_2680463 | Hspbp1        | -0.134318137 | 7.962487858 | -7.216622595 | 0.000523039 |
| ILMN_1244330 | Aimp2         | -0.313644596 | 8.386220439 | -7.212494716 | 0.000524554 |
| ILMN_2749336 | Uimc1         | 0.227048821  | 8.222853061 | 7.198709454  | 0.00052965  |
| ILMN_1232280 | Fam113a       | 0.226308203  | 8.547097889 | 7.139849458  | 0.000552068 |
| ILMN_1257962 | Ddx1          | -0.294600032 | 8.739407893 | -7.133802328 | 0.000554433 |
| ILMN_2709820 | Dtx2          | 0.162658476  | 8.458770291 | 7.116904587  | 0.000561105 |
| ILMN_1224781 | Ndufs2        | -0.314618021 | 8.154599475 | -7.088934563 | 0.000572355 |
| ILMN_2616215 | Letmd1        | 0.135019394  | 8.780736682 | 7.083431909  | 0.000574599 |
| ILMN_2611648 | Mrpl16        | -0.325295787 | 8.826052168 | -7.077901307 | 0.000576865 |
| ILMN_2756678 | NA            | 0.359102264  | 10.02157553 | 7.039390478  | 0.000592934 |
| ILMN_2473620 | Clip1         | -0.235671717 | 9.136631341 | -7.034749124 | 0.000594905 |
| ILMN_1233857 | Mcm6          | -0.353062731 | 8.319688263 | -7.025224295 | 0.000598976 |
| ILMN_2524100 | NA            | 0.356938363  | 8.954011653 | 7.021221631  | 0.000600696 |
| ILMN_3003335 | Gcc2          | -0.299626776 | 9.416426148 | -6.980406622 | 0.000618568 |
| ILMN_2670727 | Gtf3a         | -0.196536966 | 8.211565922 | -6.977793246 | 0.000619733 |
| ILMN_1254837 | Rab7          | -0.140687534 | 7.895232817 | -6.972160787 | 0.000622253 |
| ILMN_2983247 | Ndufc1        | -0.701122051 | 9.614657851 | -6.953239293 | 0.000630807 |
| ILMN_2908780 | Mzt2          | -0.184312121 | 9.523378854 | -6.936465369 | 0.000638504 |
| ILMN_1234387 | NA            | -0.280270377 | 8.054898668 | -6.922812074 | 0.000644851 |
| ILMN_3136542 | Gcdh          | 0.147893896  | 9.087216589 | 6.922536143  | 0.00064498  |

|              |               |              |             |              |             |
|--------------|---------------|--------------|-------------|--------------|-------------|
| ILMN_1227815 | NA            | -0.137697604 | 8.010879649 | -6.916124929 | 0.000647986 |
| ILMN_2756618 | Snw1          | 0.141562305  | 8.066313157 | 6.914715355  | 0.000648649 |
| ILMN_2649129 | Eif2s3x       | -0.792901756 | 9.193258349 | -6.8719579   | 0.000669144 |
| ILMN_1240067 | Tsn           | -0.222718157 | 8.63559681  | -6.856579659 | 0.000676698 |
| ILMN_2907642 | Rars          | -0.292557064 | 9.67703327  | -6.854847483 | 0.000677556 |
| ILMN_2674281 | NA            | 0.385460907  | 12.11119879 | 6.840238906  | 0.000684835 |
| ILMN_2845980 | 2410001C21Rik | 0.574424876  | 10.61612222 | 6.833503136  | 0.000688222 |
| ILMN_2915861 | Psm1          | -0.31870811  | 8.769886283 | -6.813158481 | 0.000698571 |
| ILMN_2694381 | Dnajc7        | 0.520165435  | 10.47121935 | 6.812161182  | 0.000699083 |
| ILMN_2841024 | Pnpla1        | 0.395526022  | 8.812665975 | 6.802223805  | 0.000704208 |
| ILMN_1259621 | Fam188a       | -0.128358915 | 8.070086092 | -6.791955157 | 0.00070955  |
| ILMN_3058391 | Rap2c         | -0.296133541 | 8.598771832 | -6.774847639 | 0.000718555 |
| ILMN_2741726 | Lsm2          | -0.285956723 | 8.411976229 | -6.754484525 | 0.000729447 |
| ILMN_2893081 | Mbd1          | -0.271504942 | 9.581994755 | -6.735111492 | 0.000739989 |
| ILMN_2650868 | Ino80c        | -0.119789325 | 7.918249073 | -6.7266516   | 0.000744648 |
| ILMN_2491860 | Ttyh2         | 0.608683023  | 10.04419013 | 6.725872625  | 0.000745078 |
| ILMN_1224003 | Ptbp1         | 0.467163768  | 11.78970345 | 6.725263708  | 0.000745415 |
| ILMN_2830771 | Spag7         | -0.206882488 | 8.697051356 | -6.722077784 | 0.00074718  |
| ILMN_2695035 | Pja2          | -0.460362805 | 9.388483057 | -6.711708234 | 0.00075296  |
| ILMN_2599532 | Gdi1          | 0.297046418  | 10.28304418 | 6.71032727   | 0.000753734 |
| ILMN_2907322 | Dtx2          | 0.301588801  | 9.228693948 | 6.702681537  | 0.000758034 |
| ILMN_2733330 | Rps3a         | -1.069471608 | 9.984178187 | -6.689139972 | 0.00076572  |
| ILMN_3004441 | Atp5h         | -0.22970881  | 11.3106871  | -6.683039467 | 0.000769212 |
| ILMN_2712731 | Phf10         | 0.289875989  | 10.04360891 | 6.676369943  | 0.000773051 |
| ILMN_1244845 | Narf          | 0.367252097  | 8.43388415  | 6.650664847  | 0.000788057 |
| ILMN_2759730 | Tmem144       | -0.348495549 | 8.24009403  | -6.618686808 | 0.000807201 |
| ILMN_2469966 | NA            | 0.358863678  | 14.7686972  | 6.601509842  | 0.000817707 |
| ILMN_2491859 | Ttyh2         | 0.420015645  | 10.16956882 | 6.599066442  | 0.000819214 |
| ILMN_2914295 | Tmem160       | 0.227374139  | 10.50429013 | 6.592186909  | 0.000823475 |
| ILMN_2483948 | Specc1        | 0.3170585    | 9.305705572 | 6.590318506  | 0.000824637 |
| ILMN_2732565 | Mrps31        | -0.424765508 | 9.097534739 | -6.587481239 | 0.000826405 |
| ILMN_1236303 | Dcaf13        | -0.324653865 | 8.897493759 | -6.585225519 | 0.000827813 |
| ILMN_2623325 | NA            | 0.286534979  | 9.921584119 | 6.562346007  | 0.00084226  |

|              |          |              |             |              |             |
|--------------|----------|--------------|-------------|--------------|-------------|
| ILMN_2760514 | Agps     | -0.213662005 | 8.267044809 | -6.554280687 | 0.000847422 |
| ILMN_2647172 | Serhl    | -0.216219584 | 8.36510396  | -6.545119395 | 0.00085333  |
| ILMN_1226402 | NA       | -0.574466134 | 9.067971223 | -6.483760509 | 0.00089416  |
| ILMN_1243249 | NA       | 0.511973403  | 10.64880774 | 6.479849557  | 0.000896838 |
| ILMN_1247930 | Nqo2     | -0.268520768 | 8.244635287 | -6.477055441 | 0.000898757 |
| ILMN_2879382 | Med10    | -0.241187074 | 8.189840559 | -6.468643892 | 0.000904564 |
| ILMN_1228475 | Ulk1     | 0.189883536  | 8.718640327 | 6.462415097  | 0.000908892 |
| ILMN_2826304 | Fabp6    | -1.206621863 | 9.60436554  | -6.44172653  | 0.000923441 |
| ILMN_2764143 | Scap     | 0.233868285  | 8.698985988 | 6.421375557  | 0.000938017 |
| ILMN_2749327 | Pqlc3    | -0.277765103 | 8.183118747 | -6.398107788 | 0.00095501  |
| ILMN_1232589 | Kin      | 0.177158885  | 8.525219001 | 6.389781951  | 0.000961178 |
| ILMN_1251184 | Nrf1     | 0.227180692  | 9.132033863 | 6.38461083   | 0.000965031 |
| ILMN_1242993 | NA       | -0.58733316  | 9.69813403  | -6.365914668 | 0.000979115 |
| ILMN_2714500 | Tlr12    | -0.12815507  | 7.852773127 | -6.358776499 | 0.000984555 |
| ILMN_1234257 | Gtf3c2   | 0.493596803  | 10.00482488 | 6.329565272  | 0.001007186 |
| ILMN_2649671 | NA       | 0.769940327  | 11.66619142 | 6.320526133  | 0.001014311 |
| ILMN_1249242 | Dnajc2   | -0.364982085 | 8.812841686 | -6.317070765 | 0.00101705  |
| ILMN_1225488 | Wars2    | 0.122030284  | 7.890138375 | 6.303417993  | 0.001027956 |
| ILMN_2913269 | BC027231 | 0.239063364  | 8.359887283 | 6.294299049  | 0.001035317 |
| ILMN_2679885 | Mocs1    | 1.148328055  | 10.03928909 | 6.289154909  | 0.001039496 |
| ILMN_1252524 | Zfp295   | 0.193763912  | 8.407454967 | 6.274424212  | 0.001051572 |
| ILMN_1250550 | NA       | -0.623229424 | 9.640731038 | -6.27117227  | 0.001054259 |
| ILMN_2657467 | Nelf     | 0.438043151  | 9.263452142 | 6.270810452  | 0.001054559 |
| ILMN_2550962 | NA       | 0.67233142   | 9.418958255 | 6.233891285  | 0.001085648 |
| ILMN_2971721 | Fbrsl1   | 0.303028347  | 9.505873371 | 6.211978348  | 0.001104604 |
| ILMN_3154409 | Brd2     | 0.320513324  | 10.33221637 | 6.202827978  | 0.001112633 |
| ILMN_2428963 | Xpnpep1  | -0.218318724 | 8.069886205 | -6.192304247 | 0.00112195  |
| ILMN_1247199 | NA       | -0.328326788 | 8.820381597 | -6.183614182 | 0.001129713 |
| ILMN_2662124 | Cops5    | -0.549907103 | 9.840972797 | -6.181707258 | 0.001131425 |
| ILMN_1246992 | Hmgxb3   | 0.593919971  | 11.02503012 | 6.180977594  | 0.00113208  |
| ILMN_1255561 | Hspa5    | -0.543330562 | 8.812930164 | -6.173459328 | 0.001138863 |
| ILMN_3163419 | Shf      | 0.149742383  | 8.045804089 | 6.163029127  | 0.00114835  |
| ILMN_2746132 | Fnbp1l   | -0.270442765 | 10.14758739 | -6.146795002 | 0.0011633   |

|              |               |              |             |              |             |
|--------------|---------------|--------------|-------------|--------------|-------------|
| ILMN_2712578 | Rbm47         | -0.153901416 | 8.204988588 | -6.127095981 | 0.001181745 |
| ILMN_2710103 | Gorasp1       | 0.509085611  | 10.12926342 | 6.126736104  | 0.001182085 |
| ILMN_2617265 | Ipo13         | 0.255396066  | 9.182212302 | 6.122439483  | 0.001186154 |
| ILMN_2698443 | Efnb1         | 0.272943361  | 9.503687617 | 6.113522711  | 0.001194651 |
| ILMN_2892678 | Slc9a6        | -0.120304256 | 7.864372788 | -6.088638075 | 0.00121874  |
| ILMN_3141195 | Zfp692        | 0.354161096  | 8.495258685 | 6.066458007  | 0.001240687 |
| ILMN_1259808 | NA            | -0.116352777 | 7.816823572 | -6.046254081 | 0.001261077 |
| ILMN_1247401 | Nfatc3        | 0.417375016  | 10.45308591 | 6.043945936  | 0.001263431 |
| ILMN_3163044 | Ola1          | -0.258181676 | 8.023466803 | -6.043478238 | 0.001263909 |
| ILMN_2602633 | NA            | -0.624812046 | 12.61917502 | -6.03432953  | 0.001273294 |
| ILMN_1257307 | NA            | -0.142331021 | 8.050325466 | -6.031854894 | 0.001275846 |
| ILMN_1234604 | Tti1          | 0.123220698  | 8.345621405 | 6.012484354  | 0.001296032 |
| ILMN_2777337 | NA            | -0.568384977 | 11.04262164 | -6.011401781 | 0.001297171 |
| ILMN_2995290 | Dync1i2       | -0.298561518 | 11.45827511 | -6.003578873 | 0.001305436 |
| ILMN_2759963 | Slc7a9        | -0.158723184 | 7.948069918 | -5.996290672 | 0.001313191 |
| ILMN_1251236 | Fbxw8         | 0.248104866  | 8.503979213 | 5.97913474   | 0.001331658 |
| ILMN_1234521 | Ndufs4        | -0.928204749 | 9.670537516 | -5.976681148 | 0.001334324 |
| ILMN_2846865 | Actb          | 1.848231932  | 10.21958007 | 5.954798777  | 0.001358372 |
| ILMN_1241870 | NA            | 0.168319641  | 8.084846253 | 5.945223724  | 0.001369053 |
| ILMN_2600744 | Rgs16         | 0.197558092  | 8.24570008  | 5.936096213  | 0.001379324 |
| ILMN_1244906 | Ap1b1         | 0.334382375  | 11.68402763 | 5.930874164  | 0.001385241 |
| ILMN_2636116 | Pdcd5         | -0.212482446 | 8.023412015 | -5.923008712 | 0.001394209 |
| ILMN_1222917 | Ptpn1         | 0.458159018  | 8.898315982 | 5.920413064  | 0.001397183 |
| ILMN_2856144 | Mtmt2         | -0.199092812 | 8.15812217  | -5.918059909 | 0.001399886 |
| ILMN_3162224 | I7Rn6         | -0.516640699 | 8.896746407 | -5.906894701 | 0.001412792 |
| ILMN_2939652 | Selenbp2      | 0.24631869   | 8.50630703  | 5.900182634  | 0.001420616 |
| ILMN_1249524 | Cops5         | -0.689308568 | 9.832291244 | -5.891824967 | 0.00143043  |
| ILMN_1239677 | 2010107E04Rik | -0.473277587 | 12.54073886 | -5.88189856  | 0.001442188 |
| ILMN_2663694 | Ndufs4        | -0.521129371 | 10.66435867 | -5.873519274 | 0.0014522   |
| ILMN_2669569 | NA            | -0.129263166 | 8.479269271 | -5.863804992 | 0.001463908 |
| ILMN_2730651 | Slc7a9        | 0.202990174  | 13.13432193 | 5.863380509  | 0.001464422 |
| ILMN_2481071 | Hras1         | 0.257339196  | 10.0590097  | 5.84355685   | 0.001488665 |
| ILMN_1218584 | NA            | -0.16801551  | 8.707638182 | -5.842965809 | 0.001489395 |

|              |          |              |             |              |             |
|--------------|----------|--------------|-------------|--------------|-------------|
| ILMN_2421431 | Stx12    | 0.547916959  | 9.954214888 | 5.83367213   | 0.001500927 |
| ILMN_2496310 | U2af2    | 0.183130769  | 8.746543987 | 5.823362585  | 0.00151384  |
| ILMN_2767596 | Sav1     | -0.342069876 | 9.204602576 | -5.823072606 | 0.001514206 |
| ILMN_2657546 | Cops3    | 0.1996645    | 10.56757918 | 5.808239264  | 0.001533017 |
| ILMN_2730784 | Gps2     | 0.455028437  | 9.406707254 | 5.782455066  | 0.001566363 |
| ILMN_1258501 | Adh1     | -0.103850828 | 7.962683984 | -5.775145844 | 0.001575968 |
| ILMN_3041584 | Cuta     | -0.091905048 | 7.862958886 | -5.756921922 | 0.001600214 |
| ILMN_2595026 | Yod1     | -0.164470444 | 8.391054279 | -5.755832052 | 0.001601678 |
| ILMN_1255684 | Clcn4-2  | -0.136538244 | 7.982163784 | -5.749480247 | 0.001610239 |
| ILMN_2678063 | Afm      | 0.596557017  | 9.636702165 | 5.747078902  | 0.001613489 |
| ILMN_2593038 | Rxrb     | 0.666277339  | 10.31816964 | 5.72650101   | 0.001641655 |
| ILMN_2777293 | Pafah2   | -0.118914992 | 7.859034838 | -5.726023099 | 0.001642316 |
| ILMN_1212949 | Ncstn    | -0.136001048 | 7.913051985 | -5.726016323 | 0.001642325 |
| ILMN_2814051 | Zfp512   | 0.296355189  | 8.873637377 | 5.704313853  | 0.001672663 |
| ILMN_2909068 | Mrps23   | -0.26648184  | 8.843227977 | -5.70302865  | 0.00167448  |
| ILMN_2650502 | NA       | 0.256429424  | 8.139490074 | 5.702543846  | 0.001675166 |
| ILMN_2851251 | Hn1l     | -0.243238775 | 8.151091513 | -5.701238136 | 0.001677015 |
| ILMN_2732718 | Ppp1r13b | -0.097679102 | 7.818502727 | -5.692940508 | 0.001688821 |
| ILMN_3132204 | NA       | 0.543954006  | 9.667987726 | 5.692431764  | 0.001689548 |
| ILMN_2469333 | Tnfrsf1a | -0.17866536  | 8.031765937 | -5.680607209 | 0.001706546 |
| ILMN_2727785 | NA       | -0.312771929 | 8.660111942 | -5.679492492 | 0.001708158 |
| ILMN_2723524 | Tjp3     | -0.151745039 | 8.706322329 | -5.67900363  | 0.001708866 |
| ILMN_1236703 | Ffar3    | 0.15114288   | 8.352265355 | 5.674130881  | 0.00171594  |
| ILMN_2540645 | NA       | -0.123952607 | 7.917666565 | -5.672673598 | 0.001718062 |
| ILMN_1260174 | Pde6d    | -0.250316325 | 8.389083141 | -5.67133243  | 0.001720017 |
| ILMN_1243875 | Suv420h1 | 0.305446607  | 8.255840945 | 5.661222344  | 0.001734842 |
| ILMN_2427560 | Traf6    | 0.291043096  | 8.964756244 | 5.65213259   | 0.001748297 |
| ILMN_2861331 | Pnrc2    | -0.546417687 | 9.948034314 | -5.649135033 | 0.00175276  |
| ILMN_2861176 | Calr     | -0.46967698  | 8.610624324 | -5.638355546 | 0.001768921 |
| ILMN_2617971 | Minpp1   | -0.123274177 | 7.894950582 | -5.636246706 | 0.001772102 |
| ILMN_2475832 | Utrn     | -0.09927361  | 7.834799271 | -5.633279087 | 0.001776591 |
| ILMN_3029727 | Shf      | 0.391785506  | 8.459846598 | 5.630893078  | 0.001780209 |
| ILMN_1225033 | Myg1     | -0.209239639 | 8.166387976 | -5.61424855  | 0.001805688 |

|              |               |              |             |              |             |
|--------------|---------------|--------------|-------------|--------------|-------------|
| ILMN_1254840 | Smarcb1       | -0.142044156 | 8.453918716 | -5.611422353 | 0.001810056 |
| ILMN_1222346 | NA            | 0.399018651  | 8.842852119 | 5.593345562  | 0.001838285 |
| ILMN_1237767 | Hnf4a         | 0.484947968  | 12.71468877 | 5.583939456  | 0.001853174 |
| ILMN_2833356 | 4933424B01Rik | -0.139903203 | 8.904192859 | -5.581866173 | 0.001856475 |
| ILMN_1238326 | Nkiras1       | 0.15557341   | 9.357735149 | 5.580689988  | 0.00185835  |
| ILMN_2739517 | Mecr          | 0.196374575  | 8.323225397 | 5.578097394  | 0.001862492 |
| ILMN_2632832 | Adap1         | -0.095944808 | 7.863683769 | -5.569833453 | 0.001875765 |
| ILMN_2499862 | NA            | 0.272937316  | 8.713091373 | 5.569430686  | 0.001876415 |
| ILMN_1213101 | Lig1          | 0.115099767  | 8.002942071 | 5.548163891  | 0.001911093 |
| ILMN_2574633 | NA            | -0.102339725 | 7.910380666 | -5.546185377 | 0.001914356 |
| ILMN_2734848 | Brd2          | 0.612978848  | 11.31291308 | 5.540630971  | 0.001923553 |
| ILMN_2700222 | Ktn1          | -0.097375287 | 7.871488855 | -5.537093395 | 0.001929437 |
| ILMN_2619594 | Il11ra1       | 0.434577211  | 10.49217073 | 5.528195901  | 0.001944327 |
| ILMN_2565686 | NA            | 0.141233487  | 8.022045623 | 5.526932606  | 0.001946452 |
| ILMN_2975718 | Rps6ka1       | 0.478307004  | 12.71781943 | 5.523244746  | 0.001952671 |
| ILMN_2658208 | Setd8         | 0.517421771  | 9.678199162 | 5.496586857  | 0.001998311 |
| ILMN_1235237 | NA            | -0.091355176 | 7.979890417 | -5.49016101  | 0.002009496 |
| ILMN_2680142 | Anxa5         | -0.442059969 | 10.14260625 | -5.489300511 | 0.002011    |
| ILMN_2418222 | Zbed4         | 0.315093246  | 9.78362674  | 5.479360631  | 0.002028459 |
| ILMN_2472504 | Pcyox1        | -0.397367639 | 10.45250556 | -5.466423092 | 0.002051446 |
| ILMN_1219797 | Crls1         | -0.194656255 | 7.977273384 | -5.466384315 | 0.002051515 |
| ILMN_1215633 | NA            | 0.111664325  | 8.031813564 | 5.462801699  | 0.002057934 |
| ILMN_1232596 | Pom121        | 0.519333202  | 9.204321288 | 5.462647114  | 0.002058212 |
| ILMN_2716464 | Gorasp2       | 0.354816527  | 11.46579999 | 5.456926407  | 0.002068511 |
| ILMN_1251370 | Ndufa1        | -0.811247209 | 11.2017639  | -5.455207705 | 0.002071617 |
| ILMN_2765450 | Ppp2r5d       | 0.322259134  | 10.84045222 | 5.443034006  | 0.002093771 |
| ILMN_2712018 | Bag1          | 0.270263589  | 12.01654515 | 5.434410441  | 0.00210963  |
| ILMN_2615837 | Cstf3         | 0.167537193  | 9.236494216 | 5.430531112  | 0.002116809 |
| ILMN_1241151 | Lrtm1         | 0.102482467  | 7.886535089 | 5.416250282  | 0.002143482 |
| ILMN_2705131 | Muted         | 0.187754736  | 9.882393298 | 5.415127998  | 0.002145594 |
| ILMN_2428961 | Xpnpep1       | -0.245717708 | 7.99925976  | -5.408250633 | 0.002158592 |
| ILMN_3117180 | Cpsf6         | -0.178536039 | 8.101771221 | -5.404823609 | 0.002165103 |
| ILMN_2591342 | BC021614      | 0.220590743  | 9.751783396 | 5.404149888  | 0.002166386 |

|              |               |              |             |              |             |
|--------------|---------------|--------------|-------------|--------------|-------------|
| ILMN_2470799 | NA            | -0.21291001  | 8.191566313 | -5.401813263 | 0.002170841 |
| ILMN_2723513 | Fam13b        | 0.300290031  | 9.203198214 | 5.397590083  | 0.00217892  |
| ILMN_1258357 | Dok3          | 0.220221926  | 8.363315299 | 5.395235794  | 0.002183439 |
| ILMN_2894984 | Ppdpf         | -0.409735718 | 9.492257444 | -5.381529598 | 0.002209963 |
| ILMN_2969435 | Slc4a1ap      | -0.201890239 | 8.821549993 | -5.380876162 | 0.002211237 |
| ILMN_2749178 | St3gal1       | -0.220163746 | 8.066904065 | -5.377912945 | 0.002217024 |
| ILMN_2920736 | Bbc3          | 0.64236068   | 9.262749808 | 5.376310074  | 0.002220162 |
| ILMN_2425351 | Usp1          | -0.096488937 | 7.874955383 | -5.367845402 | 0.002236816 |
| ILMN_3159149 | Rusc2         | 0.460303124  | 10.45830541 | 5.364772943  | 0.002242897 |
| ILMN_2725035 | Ebpl          | -0.236059661 | 8.126435212 | -5.360623543 | 0.002251139 |
| ILMN_1222872 | Wbscr16       | 0.177969333  | 8.326556833 | 5.356409931  | 0.002259545 |
| ILMN_2720770 | Dcps          | -0.19651825  | 8.300502704 | -5.354449129 | 0.002263469 |
| ILMN_2896314 | Axin2         | 0.290668237  | 9.696139075 | 5.348046308  | 0.002276337 |
| ILMN_2781458 | Tlcd1         | 0.357301203  | 8.515710044 | 5.341903912  | 0.002288761 |
| ILMN_2730729 | 2310003C23Rik | -0.222065864 | 7.995904337 | -5.341466528 | 0.002289649 |
| ILMN_1240550 | Psmb7         | -0.816626073 | 10.17321008 | -5.338016395 | 0.002296665 |
| ILMN_2950721 | 2810008M24Rik | -0.372561656 | 8.469826266 | -5.331969411 | 0.002309021 |
| ILMN_2823011 | Myo10         | -0.099069529 | 7.941187079 | -5.329355242 | 0.002314387 |
| ILMN_1237950 | Brd7          | -0.25561248  | 8.266920233 | -5.316533261 | 0.002340913 |
| ILMN_2591219 | Arhgef26      | 0.329170194  | 9.759956591 | 5.314366895  | 0.002345429 |
| ILMN_2683095 | Ap1g2         | 0.142498713  | 8.59318461  | 5.310154366  | 0.00235424  |
| ILMN_2438555 | 0610011F06Rik | -0.26319538  | 8.243370934 | -5.303445077 | 0.002368351 |
| ILMN_1241838 | Cacna1g       | 0.104847769  | 8.105977899 | 5.300325406  | 0.002374946 |
| ILMN_2775098 | Cyb5          | -0.55701755  | 11.42591885 | -5.289367469 | 0.002398279 |
| ILMN_1220100 | Ywhae         | 0.193462129  | 8.930518115 | 5.284658808  | 0.002408386 |
| ILMN_1255960 | Spc25         | -0.148440356 | 7.963959424 | -5.283269927 | 0.002411377 |
| ILMN_2659617 | Epn2          | 0.180625506  | 8.73944728  | 5.282893746  | 0.002412187 |
| ILMN_1259749 | NA            | 0.572066551  | 9.400548849 | 5.274758377  | 0.002429798 |
| ILMN_2684575 | Pcyox1l       | 0.162226754  | 8.150125579 | 5.26777788   | 0.002445027 |
| ILMN_2757489 | Ppp1r11       | -0.404289065 | 9.963508946 | -5.265644296 | 0.002449703 |
| ILMN_1231586 | Sertad2       | 0.355863839  | 9.361719787 | 5.254873828  | 0.002473469 |
| ILMN_2839745 | A230050P20Rik | 0.453357081  | 9.10741476  | 5.243455638  | 0.002498954 |
| ILMN_1242559 | NA            | 0.456874048  | 10.62641455 | 5.239780386  | 0.002507221 |



|              |               |              |             |              |             |
|--------------|---------------|--------------|-------------|--------------|-------------|
| ILMN_2964420 | Lipk          | -0.08718898  | 7.840965346 | -5.235912631 | 0.002515956 |
| ILMN_1256412 | Sh2b1         | 0.148421327  | 9.744045766 | 5.232328774  | 0.00252408  |
| ILMN_1214800 | Rnf167        | -0.186207715 | 8.459423734 | -5.229491083 | 0.002530535 |
| ILMN_2771944 | Psm4          | -0.552700855 | 11.24290157 | -5.228346862 | 0.002533142 |
| ILMN_2608574 | Tm2d3         | -0.171182038 | 8.089003699 | -5.225284208 | 0.002540138 |
| ILMN_2939303 | Pcyt2         | 0.414227681  | 10.65088089 | 5.223266349  | 0.00254476  |
| ILMN_2912471 | Slc48a1       | 0.354692103  | 9.141576862 | 5.22033782   | 0.002551484 |
| ILMN_2612091 | Med25         | -0.094644608 | 7.869943039 | -5.218511191 | 0.002555688 |
| ILMN_1218913 | Igf2bp3       | 0.49342598   | 11.47822916 | 5.217431428  | 0.002558178 |
| ILMN_1219656 | Tmem160       | 0.330807178  | 10.06926    | 5.212187271  | 0.002570307 |
| ILMN_2955214 | Rbfa          | 0.366925992  | 10.06619393 | 5.210168077  | 0.002574994 |
| ILMN_2997923 | Apoa1bp       | -0.542186517 | 9.749343114 | -5.201094146 | 0.002596182 |
| ILMN_2933914 | Psm14         | -0.41500792  | 8.999600415 | -5.193313941 | 0.002614509 |
| ILMN_1242837 | Gtf2ird2      | 0.254147815  | 8.699621717 | 5.192041693  | 0.00261752  |
| ILMN_1257102 | Cecr5         | 0.290034784  | 8.711630494 | 5.188423692  | 0.002626105 |
| ILMN_2574997 | NA            | 0.091979144  | 7.93314148  | 5.179608048  | 0.002647158 |
| ILMN_2751072 | Gna11         | -0.299195841 | 10.4995878  | -5.179234395 | 0.002648055 |
| ILMN_2684667 | 1810035L17Rik | -0.707069309 | 9.666960365 | -5.17884235  | 0.002648996 |
| ILMN_2757197 | Thoc3         | 0.099559838  | 8.245421744 | 5.178694991  | 0.00264935  |
| ILMN_1234922 | NA            | 0.146369108  | 8.132879739 | 5.168640136  | 0.002673623 |
| ILMN_2757368 | Creld2        | -0.308891254 | 9.163577753 | -5.166542263 | 0.00267872  |
| ILMN_2924839 | Oas1a         | 0.116093192  | 7.948413732 | 5.151485307  | 0.00271563  |
| ILMN_1239724 | Psm1          | -0.36287473  | 11.0611728  | -5.146300836 | 0.002728474 |
| ILMN_2762514 | Mier2         | 0.26379334   | 9.671391364 | 5.139553818  | 0.002745294 |
| ILMN_2653881 | NA            | 0.496233458  | 10.24650351 | 5.127816915  | 0.002774839 |
| ILMN_2942669 | Atp13a1       | 0.625563228  | 11.33576547 | 5.123272329  | 0.002786377 |
| ILMN_1233860 | Fam187b       | 0.143458088  | 8.064258512 | 5.122777839  | 0.002787636 |
| ILMN_2631994 | Hexim1        | 0.227209734  | 9.096721215 | 5.107749551  | 0.002826206 |
| ILMN_3107377 | Dnajb6        | -0.19974834  | 8.171947062 | -5.107144369 | 0.002827772 |
| ILMN_2543630 | NA            | 0.921743551  | 11.68610937 | 5.105370861  | 0.002832366 |
| ILMN_1219568 | Pmm2          | -0.305855143 | 8.490226028 | -5.104732779 | 0.002834022 |
| ILMN_1244409 | Cmtm4         | 0.374053676  | 10.42095199 | 5.094174233  | 0.002861575 |
| ILMN_2508639 | Zfp451        | 0.147781591  | 8.716776449 | 5.087758147  | 0.002878468 |

|              |               |              |             |              |             |
|--------------|---------------|--------------|-------------|--------------|-------------|
| ILMN_1229517 | Ftl1          | 0.289567925  | 14.88915206 | 5.087440898  | 0.002879306 |
| ILMN_2638721 | Csrnp2        | 0.365848736  | 8.811391993 | 5.083436116  | 0.002889912 |
| ILMN_2593852 | Obfc2b        | -0.218342874 | 8.270867456 | -5.080043493 | 0.002898933 |
| ILMN_2435996 | NA            | 0.272314047  | 8.119631481 | 5.079268515  | 0.002900998 |
| ILMN_1251143 | NA            | -0.431017221 | 9.825254628 | -5.078583644 | 0.002902824 |
| ILMN_3115185 | Sumf2         | 0.236666764  | 8.674446425 | 5.077775582  | 0.00290498  |
| ILMN_1244995 | NA            | 0.136124805  | 8.172333484 | 5.074944294  | 0.002912551 |
| ILMN_1231135 | NA            | 0.193384185  | 8.03871431  | 5.06751363   | 0.002932528 |
| ILMN_1220632 | Psmc5         | -0.440193304 | 8.914251671 | -5.046525157 | 0.002989811 |
| ILMN_2900025 | Ndufs4        | -0.758487704 | 9.997038214 | -5.045886224 | 0.002991575 |
| ILMN_3123303 | Pxn           | -0.234059369 | 8.99053241  | -5.044476244 | 0.002995471 |
| ILMN_2608043 | Hes6          | -0.15665876  | 8.003109115 | -5.043118782 | 0.002999228 |
| ILMN_2691460 | Ndufa5        | -0.230643587 | 8.950277866 | -5.034476264 | 0.003023276 |
| ILMN_1222356 | 1110067D22Rik | -0.130995269 | 8.346190494 | -5.032408906 | 0.003029061 |
| ILMN_2467185 | NA            | 0.306454786  | 8.633446076 | 5.029169822  | 0.003038151 |
| ILMN_2665552 | Mrpl22        | -0.504862209 | 8.818711945 | -5.024372141 | 0.003051672 |
| ILMN_2619455 | Mcat          | 0.16107909   | 9.054060911 | 5.021404679  | 0.003060069 |
| ILMN_2849016 | Slc47a1       | 0.466679786  | 8.505629122 | 5.019708509  | 0.003064881 |
| ILMN_2630328 | Psmc7         | -0.684543327 | 9.188355029 | -5.019473671 | 0.003065548 |
| ILMN_2491654 | Ubp2          | 0.427787919  | 10.90882826 | 5.018441539  | 0.003068481 |
| ILMN_2470211 | Upf2          | 0.305150115  | 10.95802627 | 5.014033354  | 0.003081045 |
| ILMN_2435140 | Uqcrc2        | -0.559396103 | 11.46441107 | -5.012094371 | 0.00308659  |
| ILMN_2957898 | Ufsp2         | -0.180788157 | 8.314029134 | -5.011405015 | 0.003088564 |
| ILMN_2944301 | Ece2          | -0.16550505  | 8.048675524 | -5.007371392 | 0.003100144 |
| ILMN_2887131 | Usp3          | -0.166303636 | 8.767089071 | -5.005872979 | 0.003104458 |
| ILMN_2484278 | NA            | 0.665466766  | 9.500255282 | 5.005447626  | 0.003105684 |
| ILMN_1238542 | 2810405K02Rik | -0.494166306 | 9.341819737 | -5.00406353  | 0.003109678 |
| ILMN_2967445 | Itga1         | -0.112557089 | 7.87983917  | -4.995520172 | 0.003134457 |
| ILMN_1237324 | NA            | 0.156654219  | 8.036830893 | 4.990647119  | 0.003148693 |
| ILMN_2839973 | Kat5          | -0.193062801 | 8.265138798 | -4.989883447 | 0.003150931 |
| ILMN_2591217 | Rars          | -0.508871556 | 8.807946149 | -4.978449407 | 0.003184653 |
| ILMN_2772686 | NA            | -0.299957331 | 8.657296507 | -4.96663843  | 0.003219923 |
| ILMN_2628647 | Ddc           | -0.168321561 | 8.141176449 | -4.960710929 | 0.003237793 |

|              |               |              |             |              |             |
|--------------|---------------|--------------|-------------|--------------|-------------|
| ILMN_2998135 | Atg5          | -0.164228413 | 10.39704582 | -4.955813742 | 0.003252642 |
| ILMN_2430374 | Uba1          | -0.472592792 | 10.14235262 | -4.951894275 | 0.003264583 |
| ILMN_2655555 | Taf9          | -0.233261473 | 8.170970504 | -4.949021803 | 0.003273367 |
| ILMN_1213681 | 0610009O20Rik | 0.177476132  | 8.367975365 | 4.947983565  | 0.003276548 |
| ILMN_1237892 | Lrba          | 0.189385798  | 8.132441051 | 4.947515373  | 0.003277984 |
| ILMN_1252675 | NA            | 0.294456234  | 8.25721154  | 4.944220128  | 0.00328811  |
| ILMN_2687799 | Fam50a        | -0.227277669 | 8.505952695 | -4.943809723 | 0.003289374 |
| ILMN_1229200 | NA            | 0.293908597  | 8.576599799 | 4.941035964  | 0.003297929 |
| ILMN_2481799 | Zfp317        | 0.153381684  | 8.225525242 | 4.93853644   | 0.00330566  |
| ILMN_1231930 | Tesk1         | 0.338311356  | 9.93443048  | 4.933967398  | 0.003319846 |
| ILMN_2420095 | Yaf2          | 0.113747934  | 8.253020302 | 4.932365962  | 0.003324835 |
| ILMN_1234315 | NA            | -0.511083641 | 9.56175756  | -4.928538976 | 0.003336791 |
| ILMN_2513041 | Usf2          | -0.125558695 | 7.934877222 | -4.927628057 | 0.003339644 |
| ILMN_2757268 | Tbc1d7        | -0.177127421 | 8.054195198 | -4.927131595 | 0.003341201 |
| ILMN_1241962 | Cox5b         | -0.605978343 | 12.41908824 | -4.911488918 | 0.003390664 |
| ILMN_2695539 | Mast3         | 0.747268539  | 9.949886746 | 4.910908386  | 0.003392515 |
| ILMN_2726397 | Kcnh3         | 0.075037233  | 7.843580379 | 4.909780923  | 0.003396115 |
| ILMN_1257408 | Mrpl4         | -0.333888933 | 8.564206021 | -4.906279846 | 0.003407321 |
| ILMN_2793739 | Lipo1         | -0.284945743 | 8.452212242 | -4.90536704  | 0.00341025  |
| ILMN_1223728 | NA            | -0.075924301 | 7.816070763 | -4.902111265 | 0.003420719 |
| ILMN_2748875 | Fcer1g        | -0.5121059   | 8.38473351  | -4.900152701 | 0.003427035 |
| ILMN_2619877 | Ap1m2         | -0.543594908 | 9.134437602 | -4.899224833 | 0.003430032 |
| ILMN_1217753 | Srpk1         | 0.25179515   | 10.08059261 | 4.894797624  | 0.003444372 |
| ILMN_2657694 | Ndufa9        | -0.686135795 | 10.39724328 | -4.894098734 | 0.003446642 |
| ILMN_2686270 | Slain2        | -0.182007918 | 9.337503891 | -4.888889164 | 0.003463617 |
| ILMN_2692696 | Pla2g7        | 0.613061484  | 9.046836132 | 4.888841395  | 0.003463773 |
| ILMN_1227508 | Stard5        | 0.684826992  | 10.57682201 | 4.888254479  | 0.003465692 |
| ILMN_1245471 | Ap1ar         | -0.151229606 | 12.00382293 | -4.887571627 | 0.003467925 |
| ILMN_2694038 | Pcyt2         | 0.201412556  | 9.750061296 | 4.884728426  | 0.003477244 |
| ILMN_2536184 | NA            | -0.160880246 | 8.190459219 | -4.882843592 | 0.003483437 |
| ILMN_2522765 | Ints12        | -0.273286609 | 8.598585622 | -4.881617305 | 0.003487473 |
| ILMN_1212605 | NA            | -0.263476785 | 8.675904104 | -4.879199511 | 0.003495446 |
| ILMN_2853957 | Dag1          | 0.587207625  | 9.797177525 | 4.876831643  | 0.003503275 |

|              |          |              |             |              |             |
|--------------|----------|--------------|-------------|--------------|-------------|
| ILMN_2885532 | Cpt2     | -0.506574149 | 10.07352675 | -4.871901803 | 0.00351964  |
| ILMN_1227001 | Ptbp1    | 0.554227301  | 10.97200045 | 4.871573532  | 0.003520733 |
| ILMN_2789544 | Abcf2    | -0.249941606 | 9.659541931 | -4.870530191 | 0.003524209 |
| ILMN_2745259 | Emd      | -0.132839037 | 7.935492467 | -4.867786363 | 0.003533368 |
| ILMN_2676056 | Aqr      | -0.164080925 | 8.021483412 | -4.864723223 | 0.003543626 |
| ILMN_1230244 | Klhl15   | -0.093531619 | 7.916177702 | -4.859676689 | 0.003560601 |
| ILMN_2774701 | Ube2z    | 0.234553958  | 8.663741305 | 4.855728336  | 0.003573947 |
| ILMN_2519676 | Triobp   | 0.399795207  | 12.2745447  | 4.854537237  | 0.003577984 |
| ILMN_2878501 | Nedd4l   | 0.24065612   | 10.18493521 | 4.850576672  | 0.003591446 |
| ILMN_2911788 | Tmprss13 | 0.091768844  | 7.863684615 | 4.847880103  | 0.003600646 |
| ILMN_2602858 | Prickle3 | 0.314605336  | 10.90409898 | 4.847323461  | 0.003602548 |
| ILMN_1230668 | Rsc1a1   | -0.130545552 | 8.152987382 | -4.846272098 | 0.003606144 |
| ILMN_1247889 | Atp5o    | -0.615716468 | 12.44779915 | -4.840916656 | 0.003624526 |
| ILMN_2512541 | Ube2n    | -0.215717526 | 8.200534393 | -4.834569587 | 0.003646451 |
| ILMN_2445548 | NA       | 0.257494173  | 9.924115767 | 4.833480131  | 0.00365023  |
| ILMN_1224080 | NA       | -0.155941736 | 8.055033619 | -4.830334291 | 0.003661166 |
| ILMN_2755258 | Dscr3    | -0.090689036 | 7.892866354 | -4.823382996 | 0.003685465 |
| ILMN_1257368 | NA       | -0.695965023 | 9.323053602 | -4.822097534 | 0.003689978 |
| ILMN_1217804 | Ptpn5    | 0.0850873    | 7.859405543 | 4.816975136  | 0.003708028 |
| ILMN_1217520 | Dnhd1    | 0.115130226  | 7.919630857 | 4.815054706  | 0.003714821 |
| ILMN_2681622 | Nit2     | -0.174207718 | 8.176181023 | -4.812274623 | 0.00372468  |
| ILMN_2588671 | Add3     | -0.113914831 | 8.483383379 | -4.811867218 | 0.003726127 |
| ILMN_2865822 | Napa     | 0.32101788   | 9.620838609 | 4.806939768  | 0.003743683 |
| ILMN_2635167 | NA       | 0.282738637  | 11.09115529 | 4.805402842  | 0.003749178 |
| ILMN_2798183 | Commd4   | -0.435846779 | 10.19350854 | -4.802704907 | 0.003758847 |
| ILMN_2617820 | Ppp3cc   | 0.105980956  | 8.201375544 | 4.801784844  | 0.003762151 |
| ILMN_2711705 | Dusp11   | 0.600826705  | 10.45355838 | 4.798175917  | 0.003775142 |
| ILMN_1218422 | NA       | 0.193415496  | 8.069940789 | 4.794841414  | 0.003787191 |
| ILMN_2959292 | Upp1     | -0.107978083 | 7.891441661 | -4.792311613 | 0.003796362 |
| ILMN_1237821 | NA       | 0.181187129  | 10.91062389 | 4.787655174  | 0.003813309 |
| ILMN_2679037 | NA       | -0.369127083 | 8.992293693 | -4.786887382 | 0.003816112 |
| ILMN_2760963 | Dock6    | 0.582558593  | 10.72827552 | 4.785545843  | 0.003821015 |
| ILMN_1220096 | Brf1     | 0.435862691  | 9.027571968 | 4.78235801   | 0.003832694 |

|              |               |              |             |              |             |
|--------------|---------------|--------------|-------------|--------------|-------------|
| ILMN_1259299 | 3110056O03Rik | 0.347474783  | 10.09158861 | 4.781850173  | 0.003834558 |
| ILMN_2723920 | Itpk1         | 0.731900284  | 12.38750275 | 4.773980336  | 0.003863582 |
| ILMN_3136809 | Git2          | 0.1553114    | 8.431563046 | 4.770355758  | 0.003877034 |
| ILMN_2935389 | Snrnp35       | -0.073025609 | 7.822678577 | -4.767948497 | 0.003885997 |
| ILMN_1240605 | NA            | 0.117997968  | 7.949320901 | 4.766394205  | 0.003891798 |
| ILMN_2642158 | Atp5s         | -0.108752395 | 8.716985879 | -4.764577802 | 0.003898588 |
| ILMN_3153893 | Zfp91         | -0.12314946  | 8.226641678 | -4.760461937 | 0.003914027 |
| ILMN_2928875 | Atp6v1g1      | -0.5171215   | 8.702132651 | -4.75926421  | 0.003918532 |
| ILMN_1254855 | Mknk1         | 0.208726468  | 8.756704541 | 4.757354844  | 0.003925727 |
| ILMN_1250688 | Fat1          | -0.559219263 | 11.18901623 | -4.756736288 | 0.003928062 |
| ILMN_2942276 | Luzp1         | 0.26090613   | 10.51853223 | 4.754185604  | 0.003937704 |
| ILMN_2664511 | Osgep         | -0.31050165  | 9.537472614 | -4.754173767 | 0.003937748 |
| ILMN_2451578 | Trmu          | 0.082989758  | 8.219267227 | 4.750909221  | 0.003950129 |
| ILMN_1246694 | Dus1l         | 0.30488387   | 9.574332667 | 4.74513957   | 0.003972118 |
| ILMN_2652890 | Pkp3          | 0.48992589   | 9.811858595 | 4.743224391  | 0.003979449 |
| ILMN_2426853 | Ubd           | -0.116886126 | 7.864434944 | -4.739879471 | 0.003992288 |
| ILMN_2825562 | Cybrd1        | 0.081183376  | 7.85950551  | 4.73558563   | 0.00400884  |
| ILMN_2899599 | Ddx3y         | 1.692582259  | 10.55120438 | 4.735040674  | 0.004010946 |
| ILMN_1249301 | Bckdk         | -0.158747161 | 9.150479574 | -4.73380231  | 0.004015737 |
| ILMN_2746776 | Ubp1          | 0.154825757  | 8.034999707 | 4.73348566   | 0.004016963 |
| ILMN_2497293 | NA            | 0.363334141  | 8.931772035 | 4.73332954   | 0.004017568 |
| ILMN_2630438 | Psm7          | 0.441567421  | 11.03100129 | 4.732658199  | 0.00402017  |
| ILMN_2857581 | Rars2         | -0.184660677 | 8.38646861  | -4.728602726 | 0.004035926 |
| ILMN_2499944 | Tomm7         | -0.597973378 | 10.21133496 | -4.72711224  | 0.004041734 |
| ILMN_2629297 | Nlrp3         | -0.077000205 | 7.819737595 | -4.722710447 | 0.004058944 |
| ILMN_2727722 | Pla2g4f       | 0.554908849  | 8.587611615 | 4.718968746  | 0.004073639 |
| ILMN_2965641 | 2410002F23Rik | 0.26213301   | 8.791184199 | 4.718829778  | 0.004074186 |
| ILMN_1222584 | Srsf11        | -0.267829666 | 8.232601074 | -4.713225575 | 0.004096313 |
| ILMN_2838317 | Pqlc3         | -0.325425579 | 8.511119785 | -4.710195711 | 0.004108334 |
| ILMN_2473755 | Vps18         | 0.471027594  | 11.07234361 | 4.709763848  | 0.00411005  |
| ILMN_2612477 | Rbm14         | 0.440683753  | 9.047252166 | 4.709304129  | 0.004111879 |
| ILMN_3072536 | Eif5          | -0.599257842 | 10.14070968 | -4.70724435  | 0.004120081 |
| ILMN_1220311 | NA            | 0.127009458  | 8.142317357 | 4.706348662  | 0.004123654 |

|              |               |              |             |              |             |
|--------------|---------------|--------------|-------------|--------------|-------------|
| ILMN_1236577 | NA            | -0.175327532 | 8.585295851 | -4.705402001 | 0.004127434 |
| ILMN_2747897 | Ndufs3        | -0.543861232 | 9.733379779 | -4.702893728 | 0.004137469 |
| ILMN_2700292 | H13           | -0.338682216 | 8.604512    | -4.700787931 | 0.004145915 |
| ILMN_1230145 | Acvr2b        | 0.783850827  | 9.81115775  | 4.695980632  | 0.004165271 |
| ILMN_2612143 | Sin3a         | 0.260617353  | 9.455867239 | 4.695529851  | 0.004167091 |
| ILMN_2620336 | Ralb          | 0.421252967  | 11.23264863 | 4.694515805  | 0.004171189 |
| ILMN_2827311 | Gtf3a         | -0.334140074 | 8.998173385 | -4.693021854 | 0.004177235 |
| ILMN_2977903 | Zc3h4         | 0.473510827  | 9.072428881 | 4.692582283  | 0.004179016 |
| ILMN_2591381 | Ppm1b         | 0.133893358  | 11.5266769  | 4.691842633  | 0.004182015 |
| ILMN_1229957 | Il11ra1       | 0.517303932  | 11.41167336 | 4.686923282  | 0.00420202  |
| ILMN_3158698 | BC046404      | 0.380145624  | 11.72168451 | 4.684306801  | 0.004212705 |
| ILMN_2752497 | Nsmce2        | -0.207007509 | 8.417462669 | -4.683624081 | 0.004215499 |
| ILMN_2896492 | Jmjd8         | 0.574294914  | 9.702760627 | 4.680803464  | 0.004227061 |
| ILMN_2792868 | Blvrb         | -0.230363731 | 10.46593731 | -4.679962967 | 0.004230513 |
| ILMN_1238640 | 2310003H01Rik | 0.230139323  | 8.976014951 | 4.679482021  | 0.00423249  |
| ILMN_2859518 | Krtcap3       | 0.385327863  | 11.2994665  | 4.678161075  | 0.004237926 |
| ILMN_2431007 | NA            | 0.18214399   | 8.593504845 | 4.675947655  | 0.004247051 |
| ILMN_2760043 | Prpf40a       | -0.25246387  | 8.295950236 | -4.671010999 | 0.004267486 |
| ILMN_1236131 | Mrpl48        | -0.355752634 | 8.92302407  | -4.669390761 | 0.004274217 |
| ILMN_2597481 | Rala          | -0.201914796 | 8.20588435  | -4.667948473 | 0.004280219 |
| ILMN_2663996 | Rnf186        | 0.547778795  | 10.24960265 | 4.665643681  | 0.00428983  |
| ILMN_2836023 | Stra13        | 0.190401787  | 8.329561958 | 4.664018967  | 0.00429662  |
| ILMN_2976188 | Stat5a        | 0.102696948  | 8.032935794 | 4.663116663  | 0.004300397 |
| ILMN_1217589 | NA            | -0.086015808 | 7.821772304 | -4.659205723 | 0.004316809 |
| ILMN_1217000 | Tfpt          | -0.141198805 | 8.023630718 | -4.657235163 | 0.004325105 |
| ILMN_1229177 | Klk1b26       | -0.402322989 | 8.224271976 | -4.656713154 | 0.004327306 |
| ILMN_2650775 | Nol12         | -0.098476616 | 8.08043055  | -4.656497928 | 0.004328214 |
| ILMN_2777175 | Stk40         | 0.468069643  | 10.29506843 | 4.653879515  | 0.004339275 |
| ILMN_2597899 | Zfc3h1        | 0.324705085  | 10.60364196 | 4.646829286  | 0.00436922  |
| ILMN_1240274 | Prcc2b        | 0.348983949  | 10.35726293 | 4.64541976   | 0.004375235 |
| ILMN_2615134 | NA            | 0.246504253  | 8.536196547 | 4.644683274  | 0.004378382 |
| ILMN_2944508 | Bglap2        | 0.602799772  | 9.072971263 | 4.64302101   | 0.004385493 |
| ILMN_3121784 | Fam53b        | 0.124215483  | 8.287658486 | 4.642155996  | 0.004389199 |

|              |           |              |             |              |             |
|--------------|-----------|--------------|-------------|--------------|-------------|
| ILMN_2764737 | Psmc2     | -0.178729058 | 8.183982474 | -4.640069177 | 0.004398155 |
| ILMN_2702061 | Tubb2c    | -0.474531369 | 11.81702178 | -4.638608244 | 0.004404437 |
| ILMN_2920549 | Map2k4    | -0.194518664 | 9.557144854 | -4.638102618 | 0.004406613 |
| ILMN_1249670 | Pdia4     | -0.483584569 | 9.081028664 | -4.638024123 | 0.004406951 |
| ILMN_2721613 | Pde8b     | -0.114952145 | 7.883120877 | -4.631116333 | 0.004436813 |
| ILMN_2596324 | D6Wsu163e | -0.143402457 | 8.529073332 | -4.625634396 | 0.004460676 |
| ILMN_2596880 | Brap      | 0.164668232  | 8.13169551  | 4.620587899  | 0.004482773 |
| ILMN_2682787 | Cops7a    | -0.209467541 | 8.20024417  | -4.620183444 | 0.004484549 |
| ILMN_1220115 | NA        | 0.240396632  | 10.03029852 | 4.608852528  | 0.004534644 |
| ILMN_1219084 | NA        | -0.150846647 | 8.080381297 | -4.607614757 | 0.004540155 |
| ILMN_2590015 | Ppdpf     | -0.263596578 | 8.49080589  | -4.607249304 | 0.004541784 |
| ILMN_2630344 | Ercc2     | 0.081715913  | 8.093322795 | 4.606217006  | 0.004546387 |
| ILMN_3009579 | Enox2     | -0.285423858 | 8.490087285 | -4.59886296  | 0.00457934  |
| ILMN_2655163 | Dock8     | 0.170722573  | 8.095735688 | 4.59403779   | 0.00460111  |
| ILMN_2660898 | Aggf1     | -0.094626617 | 7.96183699  | -4.589367691 | 0.004622292 |
| ILMN_1222754 | NA        | 0.195093691  | 8.065452901 | 4.587111264  | 0.004632567 |
| ILMN_1213074 | Ceacam1   | -0.116447336 | 7.980473734 | -4.586132809 | 0.00463703  |
| ILMN_2777535 | NA        | -0.444419927 | 8.459454605 | -4.585144842 | 0.004641542 |
| ILMN_2710678 | Nfic      | 0.432456419  | 8.702363677 | 4.584876101  | 0.00464277  |
| ILMN_2757986 | Sgsh      | 0.466229196  | 10.08965451 | 4.584232261  | 0.004645714 |
| ILMN_1246740 | Slc35b2   | 0.140835964  | 10.75745581 | 4.577700534  | 0.004675701 |
| ILMN_2749484 | Rfc2      | -0.203868768 | 9.155519047 | -4.567242887 | 0.004724173 |
| ILMN_1253733 | NA        | -0.090870612 | 7.832642172 | -4.56682729  | 0.004726111 |
| ILMN_2753057 | Dtd1      | -0.229061583 | 8.18073295  | -4.566615586 | 0.004727099 |
| ILMN_1233127 | Rfwd2     | 0.184085804  | 8.45769873  | 4.566085959  | 0.004729571 |
| ILMN_1245979 | NA        | -0.304880403 | 8.353637026 | -4.565843646 | 0.004730702 |
| ILMN_2605004 | Ndufb9    | -0.458055493 | 9.761699106 | -4.56349096  | 0.004741703 |
| ILMN_1232875 | Sgk3      | -0.127548961 | 7.92202964  | -4.559342053 | 0.004761175 |
| ILMN_1219543 | Lingo4    | 0.085053664  | 8.027958291 | 4.55548275   | 0.00477937  |
| ILMN_1226151 | Gpsm1     | 0.193732572  | 8.344829423 | 4.552298242  | 0.004794443 |
| ILMN_2488846 | Tmod4     | 0.114102322  | 8.007014439 | 4.551902686  | 0.004796319 |
| ILMN_1225995 | Morc2a    | 0.251686804  | 9.626854228 | 4.546031387  | 0.004824265 |
| ILMN_2713039 | Ttc33     | -0.129812116 | 7.938067048 | -4.540755542 | 0.004849535 |

|              |         |              |             |              |             |
|--------------|---------|--------------|-------------|--------------|-------------|
| ILMN_2771380 | Cd52    | -0.179394452 | 8.00090098  | -4.538479853 | 0.004860482 |
| ILMN_1226525 | H2-Ab1  | -0.724268351 | 9.639458872 | -4.532467962 | 0.004889537 |
| ILMN_1228976 | Tardbp  | -0.072155139 | 7.86426419  | -4.530289451 | 0.004900114 |
| ILMN_3127595 | Lman1l  | 0.07064878   | 7.857690835 | 4.52950692   | 0.00490392  |
| ILMN_2755008 | Nfkbiz  | 0.279928357  | 9.724395417 | 4.529078234  | 0.004906007 |
| ILMN_2724235 | Myo18a  | 0.310426683  | 9.692696856 | 4.526636682  | 0.004917909 |
| ILMN_3162388 | Bbs5    | -0.070913435 | 8.229672731 | -4.526128983 | 0.004920388 |
| ILMN_2605575 | Alg14   | -0.365183246 | 8.630065492 | -4.522534345 | 0.004937981 |
| ILMN_2623451 | Ift172  | -0.156365029 | 8.192119405 | -4.519761595 | 0.004951601 |
| ILMN_1238654 | Gorasp2 | -0.087760697 | 7.884547232 | -4.519358505 | 0.004953585 |
| ILMN_2909782 | Rras2   | 0.326832092  | 9.530042272 | 4.516726558  | 0.004966559 |
| ILMN_2728813 | Aadac   | -0.412183125 | 8.293386558 | -4.513536312 | 0.004982337 |
|              |         |              |             |              |             |

Supplementary Table 1. Probes with differential expression between CKO and control mice sorted by P value in T test between normalized expression values (N= 3 in each group). This gene list was further interrogated by pathway analysis to assist in hypothesis generation for potential mechanisms underlying the difference in observed NEC between CKO and controls.



| Ingenuity Canonical Pathways                            | -log(p-value) | Ratio    | Molecules                                                                                                                                 |
|---------------------------------------------------------|---------------|----------|-------------------------------------------------------------------------------------------------------------------------------------------|
| Protein Ubiquitination Pathway                          | 7.71E+00      | 8.58E-02 | PSMB3,PSMD7,PSMA7,DNAJC2,USP1,HSPA5,PSMB6,PSMC5,USP3,UBD,TRAF6,PSMB7,BAG1,PSMB1,PSMA4,PSMD1,PSMD14,UBA1,DNAJB6,PSMC2,NEDD4L,DNAJC7,UBE2E1 |
| Agrin Interactions at Neuromuscular Junction            | 3.84E+00      | 1.16E-01 | MAP2K4,PXN,RRAS2,ACTB,UTRN,HRAS,ITGA1,DAG1                                                                                                |
| Mitochondrial Dysfunction                               | 3.48E+00      | 6.21E-02 | MAP2K4,NDUFA5,NDUFB9,NDUFA9,UQCRC2,NDUFS2,NCSTN,CYB5A,NDUFS3,COX5B (includes EG:100002384),NDUFS4                                         |
| Assembly of RNA Polymerase III Complex                  | 2.55E+00      | 1.88E-01 | GTF3C2,GTF3A,BRF1 (includes EG:2972)                                                                                                      |
| Germ Cell-Sertoli Cell Junction Signaling               | 2.55E+00      | 6.10E-02 | MAP2K4,EPN2,PXN,AGGF1,RRAS2,TUBB4B,TNFRSF1A,ACTB,HRAS,MTMR2                                                                               |
| Glucocorticoid Receptor Signaling                       | 2.17E+00      | 4.42E-02 | MAP2K4,TAF9,STAT5A,NFATC3,BGLAP,HRAS,PPP3CC,ERCC2,TAF13 (includes EG:310784),HSPA5,TRAF6,RRAS2,BAG1                                       |
| Sertoli Cell-Sertoli Cell Junction Signaling            | 2.16E+00      | 5.13E-02 | MAP2K4,EPN2,AGGF1,RRAS2,TUBB4B,TJP3,TNFRSF1A,ACTB,HRAS,MTMR2                                                                              |
| Paxillin Signaling                                      | 2.11E+00      | 6.31E-02 | MAP2K4,PXN,RRAS2,ACTB,HRAS,ITGA1,GIT2                                                                                                     |
| TGF- $\beta$ Signaling                                  | 1.94E+00      | 6.74E-02 | MAP2K4,TRAF6,RRAS2,HRAS,ACVR2B,HNF4A                                                                                                      |
| Thyroid Cancer Signaling                                | 1.90E+00      | 9.52E-02 | RRAS2,KLK3,HRAS,RXR $\beta$                                                                                                               |
| VEGF Signaling                                          | 1.85E+00      | 6.06E-02 | EIF2S3,PXN,RRAS2,YWHAE,ACTB,HRAS                                                                                                          |
| 14-3-3-mediated Signaling                               | 1.84E+00      | 5.98E-02 | MAP2K4,RRAS2,YWHAE,TUBB4B,TNFRSF1A,HRAS,RPS6KA1                                                                                           |
| D-myo-inositol (1,4,5,6)-Tetrakisphosphate Biosynthesis | 1.83E+00      | 8.57E-02 | ITPK1,ACP1 (includes EG:11431),PTPN1                                                                                                      |
| D-myo-inositol (3,4,5,6)-tetrakisphosphate Biosynthesis | 1.83E+00      | 8.57E-02 | ITPK1,ACP1 (includes EG:11431),PTPN1                                                                                                      |
| Apoptosis Signaling                                     | 1.83E+00      | 6.32E-02 | MAP2K4,RRAS2,TNFRSF1A,HRAS,RPS6KA1,NAIP                                                                                                   |
| PKC Signaling in T Lymphocytes                          | 1.78E+00      | 4.90E-02 | MAP2K4,RRAS2,NFATC3,FCER1G,HRAS,PPP3CC,HLA-DQB1                                                                                           |
| Role of MAPK Signaling in                               | 1.77E+00      | 7.25E-02 | MAP2K4,RRAS2,HRAS,PLA2G4F,PLA2G7                                                                                                          |

|                                                                      |          |          |                                               |
|----------------------------------------------------------------------|----------|----------|-----------------------------------------------|
| the Pathogenesis of Influenza                                        |          |          |                                               |
| Neurotrophin/TRK Signaling                                           | 1.75E+00 | 6.67E-02 | MAP2K4,RRAS2,KLK3,HRAS,RPS6KA1                |
| TNFR1 Signaling                                                      | 1.67E+00 | 7.69E-02 | MAP2K4,TANK,TNFRSF1A,NAIP                     |
| TNFR2 Signaling                                                      | 1.60E+00 | 9.09E-02 | MAP2K4,TANK,NAIP                              |
| Ephrin B Signaling                                                   | 1.60E+00 | 6.25E-02 | PXN,EFNB1,ACP1 (includes EG:11431),GNA11,HRAS |
| Cleavage and Polyadenylation of Pre-mRNA                             | 1.54E+00 | 1.67E-01 | CPSF6,CSTF3                                   |
| Regulation of IL-2 Expression in Activated and Anergic T Lymphocytes | 1.47E+00 | 5.62E-02 | MAP2K4,RRAS2,NFATC3,HRAS,PPP3CC               |
| Oleate Biosynthesis II (Animals)                                     | 1.47E+00 | 1.05E-01 | UFSP2,CYB5A                                   |
| Nur77 Signaling in T Lymphocytes                                     | 1.44E+00 | 6.35E-02 | FCER1G,PPP3CC,HLA-DQB1,SIN3A                  |
| Oncostatin M Signaling                                               | 1.38E+00 | 8.57E-02 | STAT5A,RRAS2,HRAS                             |
| Role of JAK2 in Hormone-like Cytokine Signaling                      | 1.38E+00 | 8.33E-02 | SH2B1,STAT5A,PTPN1                            |
| Myc Mediated Apoptosis Signaling                                     | 1.37E+00 | 6.67E-02 | MAP2K4,RRAS2,YWHAE,HRAS                       |
| Death Receptor Signaling                                             | 1.37E+00 | 6.25E-02 | MAP2K4,TANK,TNFRSF1A,NAIP                     |
| Induction of Apoptosis by HIV1                                       | 1.35E+00 | 6.15E-02 | MAP2K4,BBC3,TNFRSF1A,NAIP                     |
| Spliceosomal Cycle                                                   | 1.35E+00 | 1.11E-01 | U2AF2                                         |
| FAK Signaling                                                        | 1.34E+00 | 4.95E-02 | PXN,RRAS2,ACTB,HRAS,GIT2                      |

Supplementary table 2. Results of Ingenuity Pathway analysis that reveals over-expression of genes determining differential expression between CKO and controls from a number of pathways. Pathways with P value < 0.05 are presented in this table. These include apoptosis signaling and pathways for signaling in T cell lymphocytes.
